# Supplementary material for: Cooperative ion pair recognition by multitopic l-ornithine based salt receptors
Source: Royal Society of Chemistry journal article supplement (doi:10.1039/c4nj01865f), 2015-01-01

## Supporting Information

Cooperative ion pair recognition by multitopic L-ornithine based salt receptors

by

*Piotr Piątek, Szymon Zdanowski, Jan Romański\**

Department of Chemistry, University of Warsaw, Pasteura 1, 02-093 Warsaw, Poland

### TABLE OF CONTENTS

|                                                                              |    |
|------------------------------------------------------------------------------|----|
| 1. General .....                                                             | 1  |
| 2. NMR spectra .....                                                         | 2  |
| 3. UV-vis measurements (Job Plots, Dilution studies, Binding isotherms)..... | 6  |
| 4. NMR measurements.....                                                     | 12 |

### GENERAL INFORMATION

Unless specifically indicated, all other chemicals and reagents used in this study were purchased from commercial sources and used as received. Purification of products was performed using column chromatography on silica gel (Merck Kieselgel 60, 230-400 mesh) with mixtures of chloroform/methanol. Thin-layer chromatography (TLC) was performed on silica gel plates (Merck Kieselgel 60 F254).

<sup>1</sup>H and <sup>13</sup>C NMR spectra used in the characterization of products were recorded on Bruker 300 spectrometer using a residual protonated solvent as internal standard. The following abbreviations are used to indicate the multiplicity: s - singlet; d - doublet; t - triplet; q - quartet; m - multiplet, b – broad signal.

High resolution mass spectra (HRMS) were measured on a Quattro LC Micromass unit using ESI technique.

UV-vis analyses were performed using Thermo Spectronic Unicam UV500 Spectrophotometer.

**NMR SPECTRA**  
**Fig. S1 and S2:  $^1\text{H}$  and  $^{13}\text{C}$  NMR of receptor 1.**

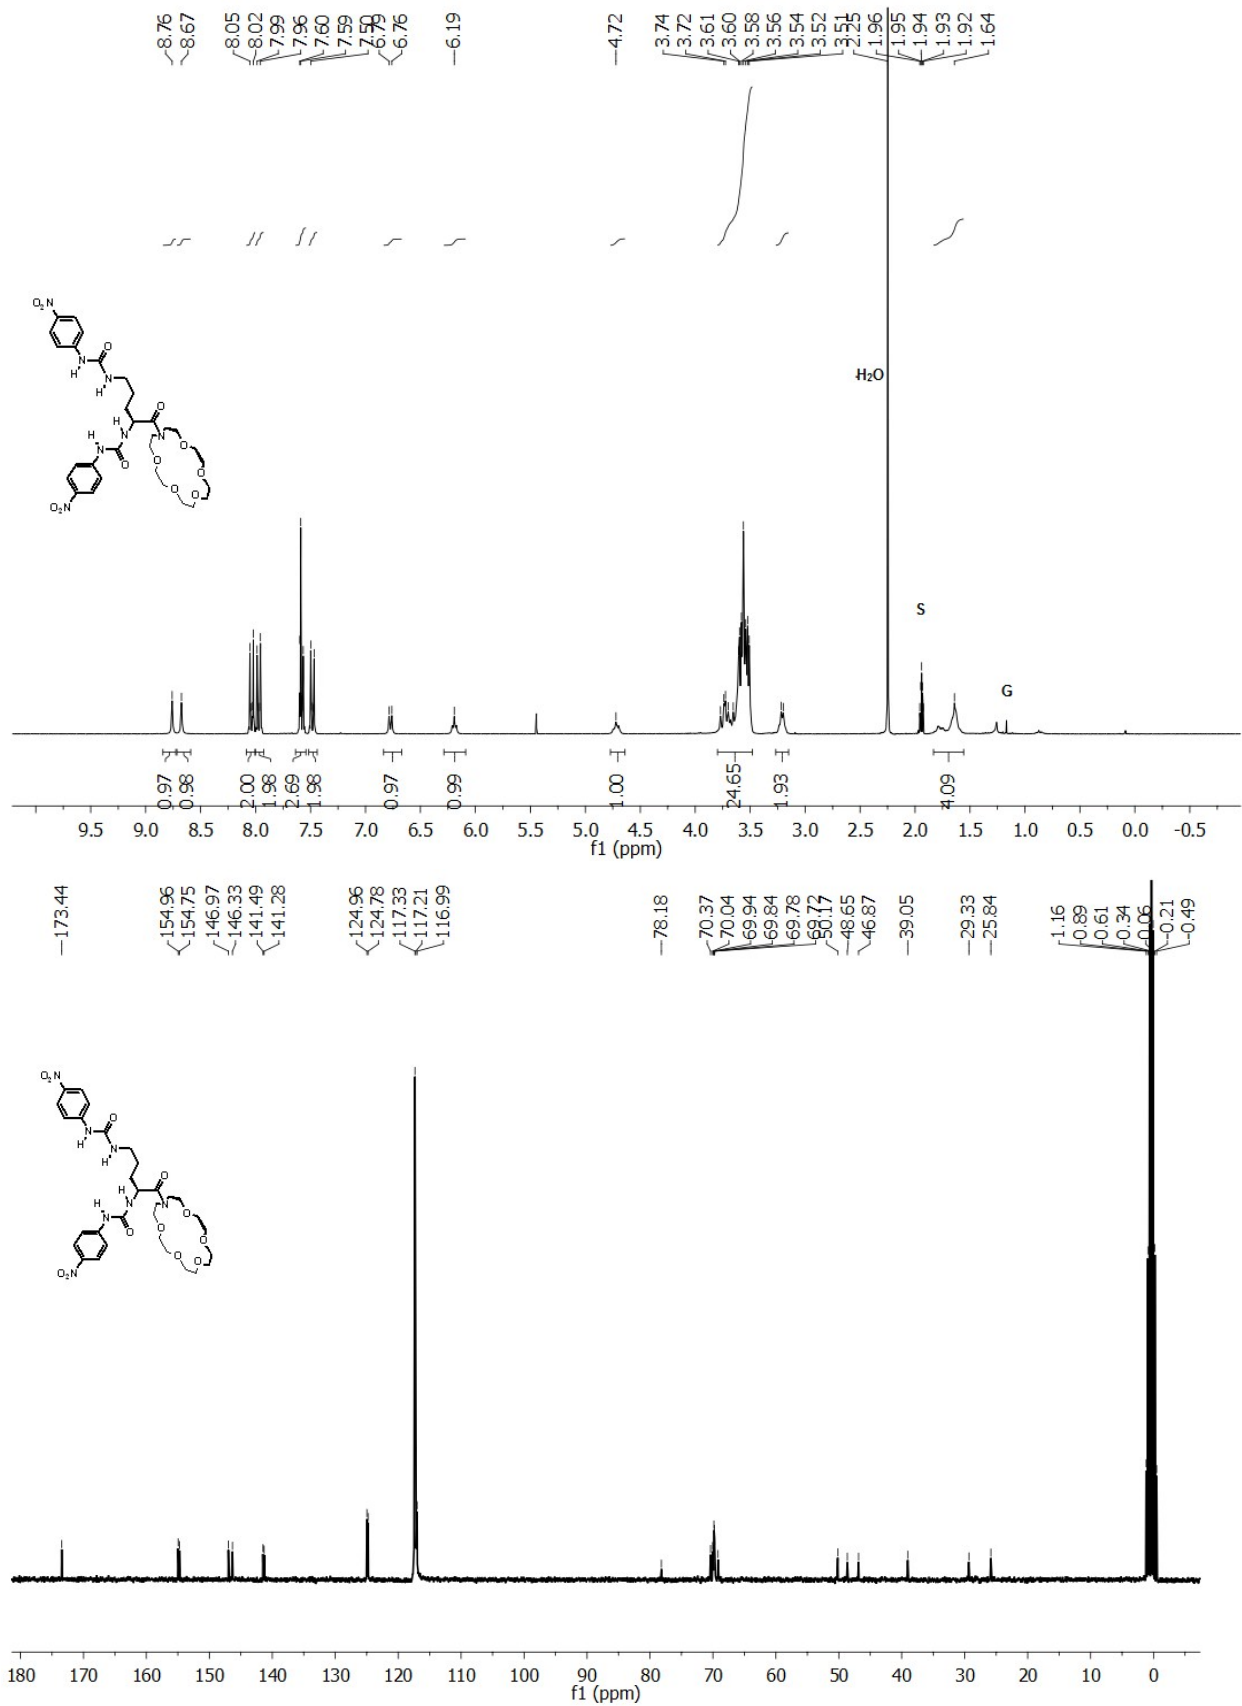

**Fig. S3 and S3:**  $^1\text{H}$  and  $^{13}\text{C}$  NMR of receptor 2.

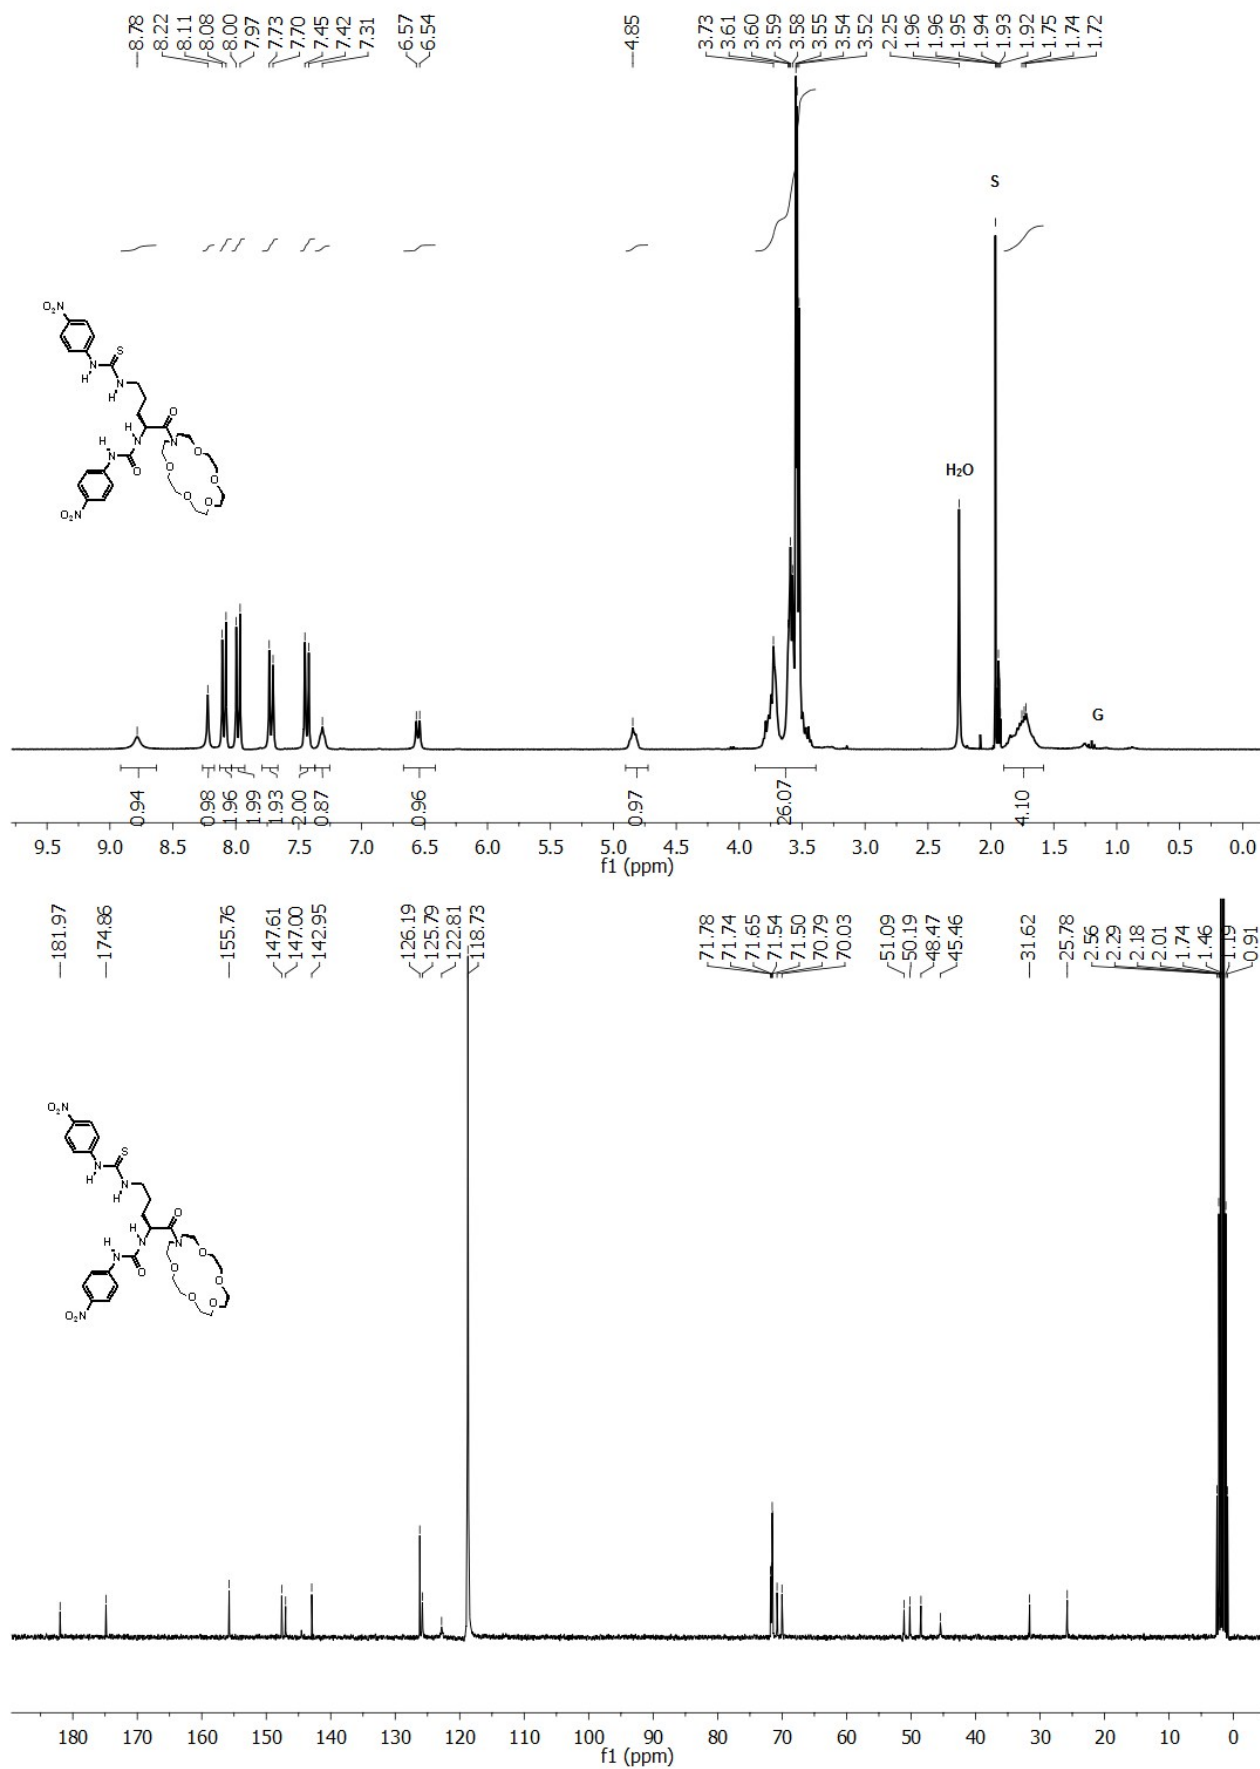

**Fig. S5 and S6:  $^1\text{H}$  and  $^{13}\text{C}$  NMR of receptor 5.**

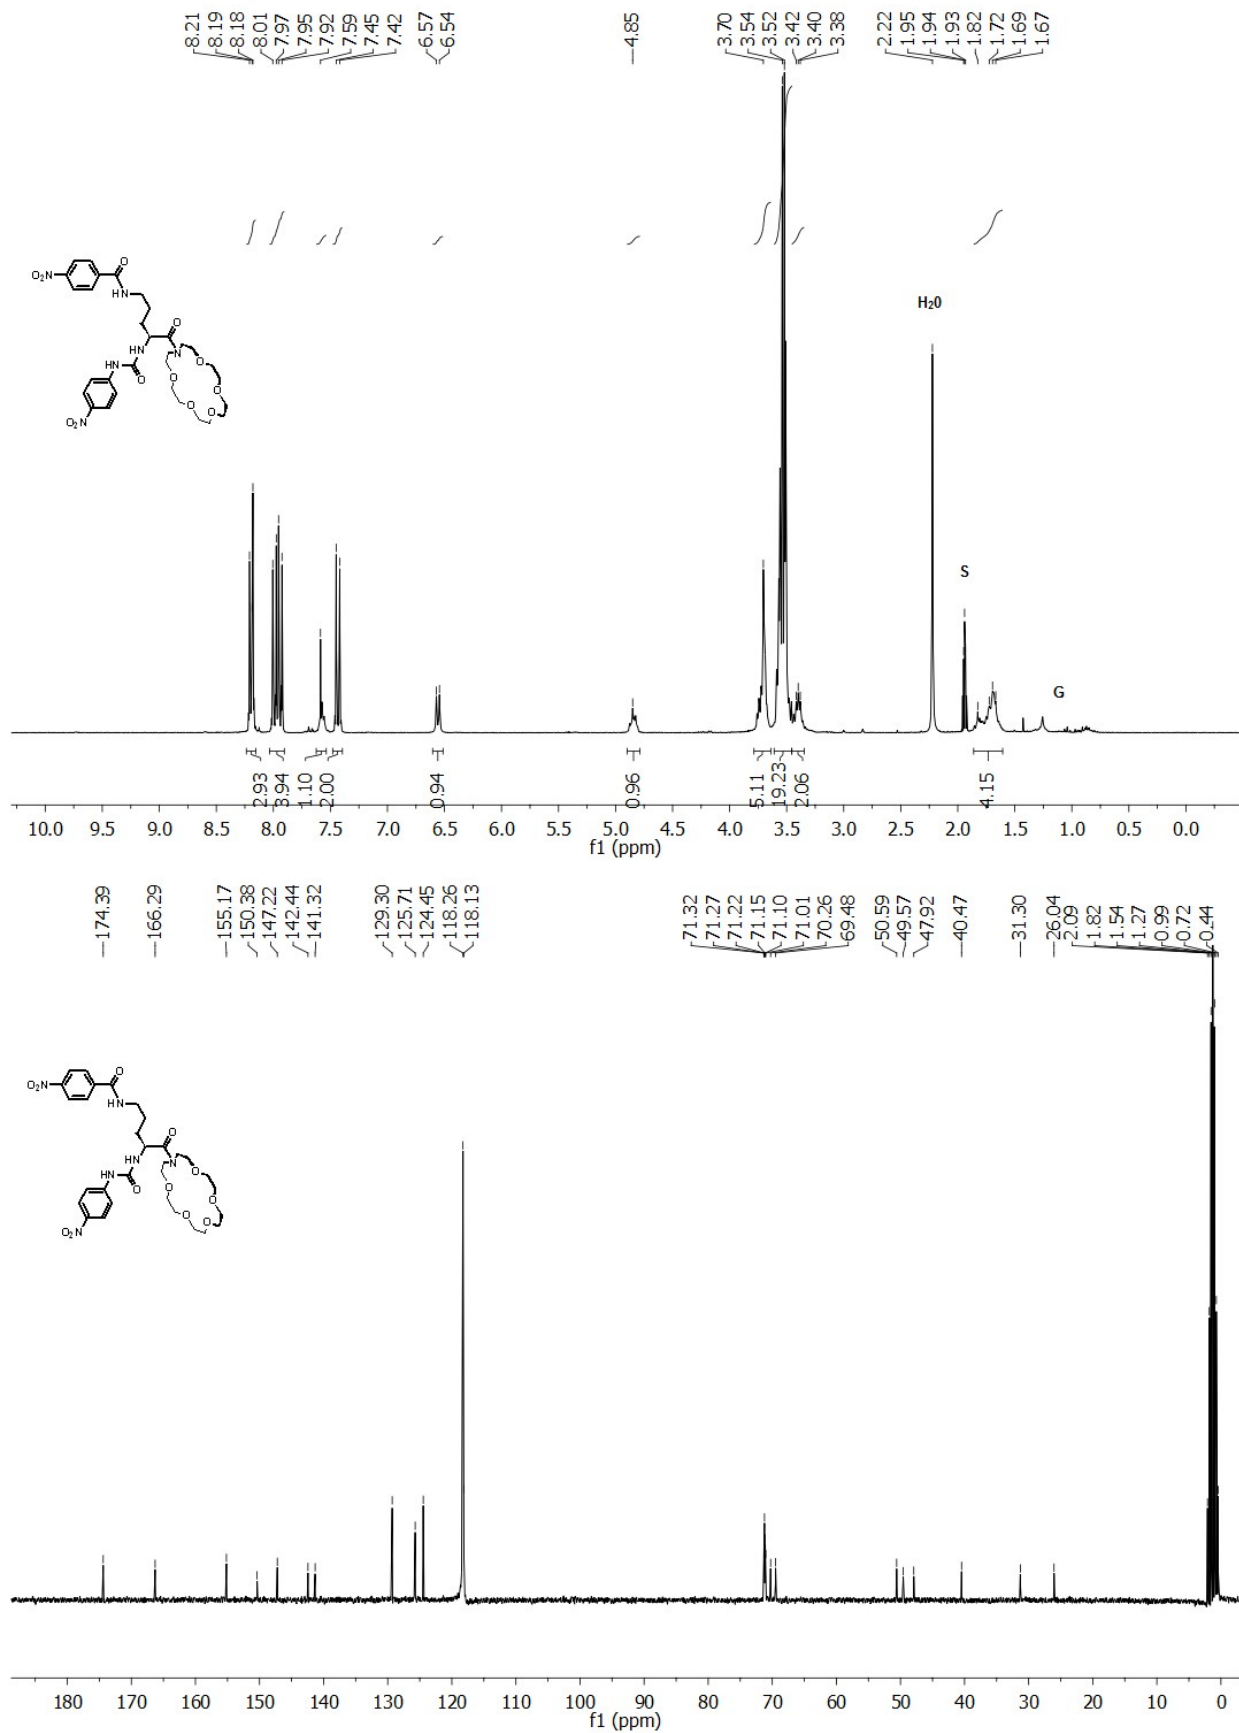

**Fig. S7 and S8:  $^1\text{H}$  and  $^{13}\text{C}$  NMR of receptor 6.**

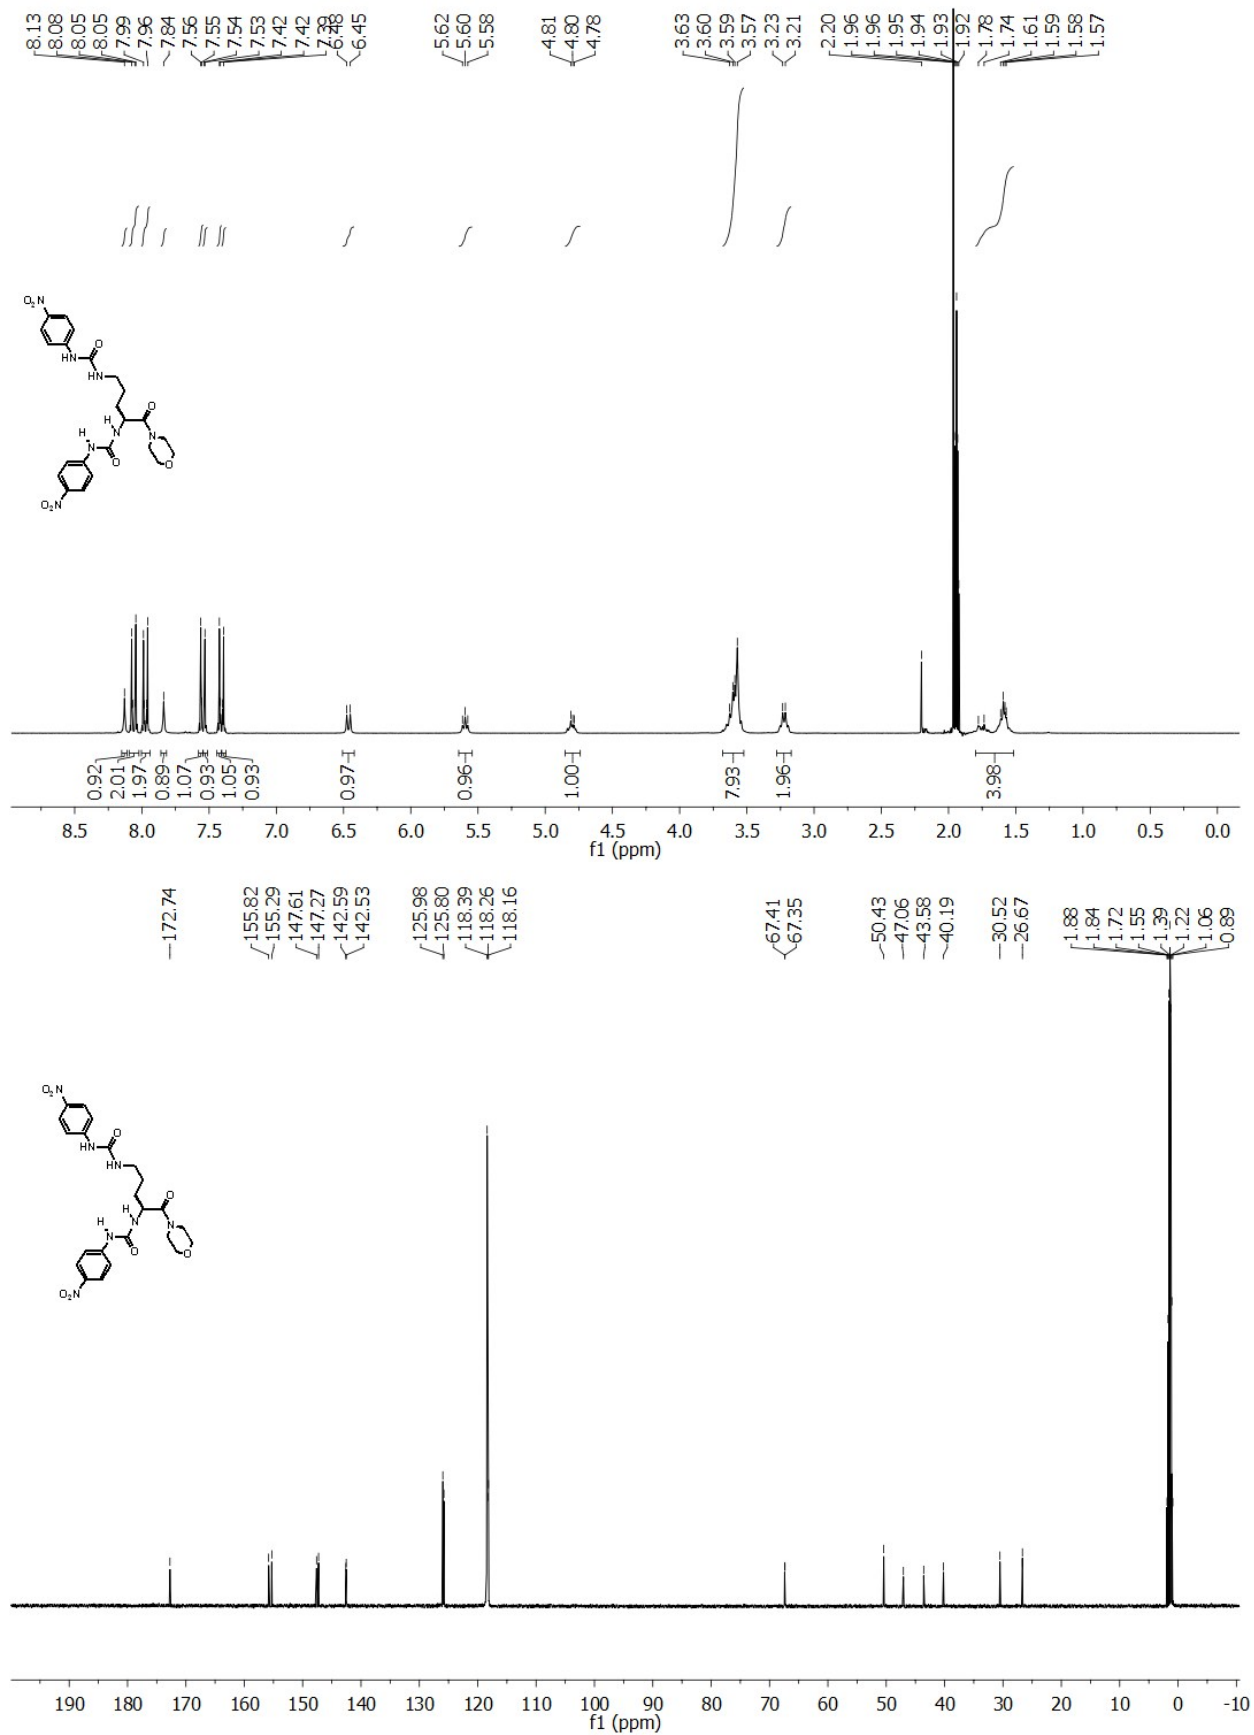

„S”- solvent, „G”- grease

## UV-VIS EXPERIMENTS

**Fig. S9:** Representative Uv-Vis Titration Spectra

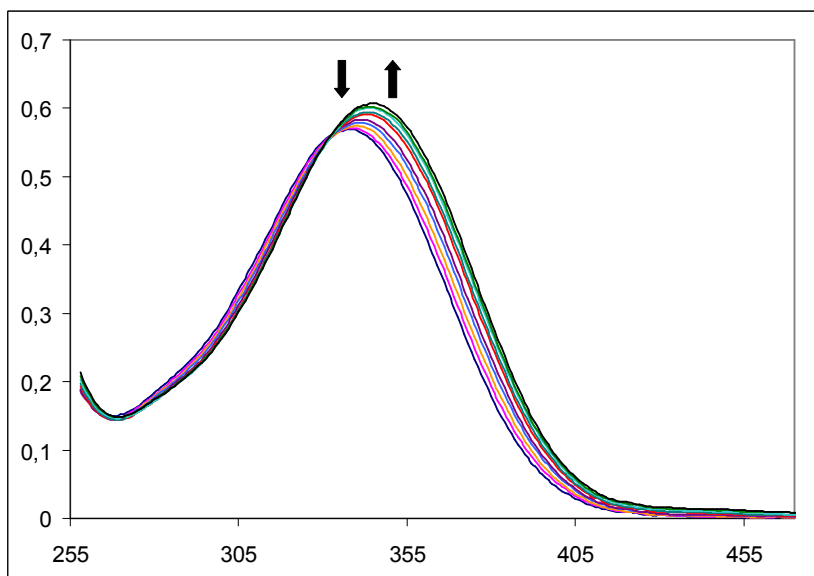

## DILUTION AND JOB PLOTS.

**Fig. S10:** Dilution curve of receptor 1.

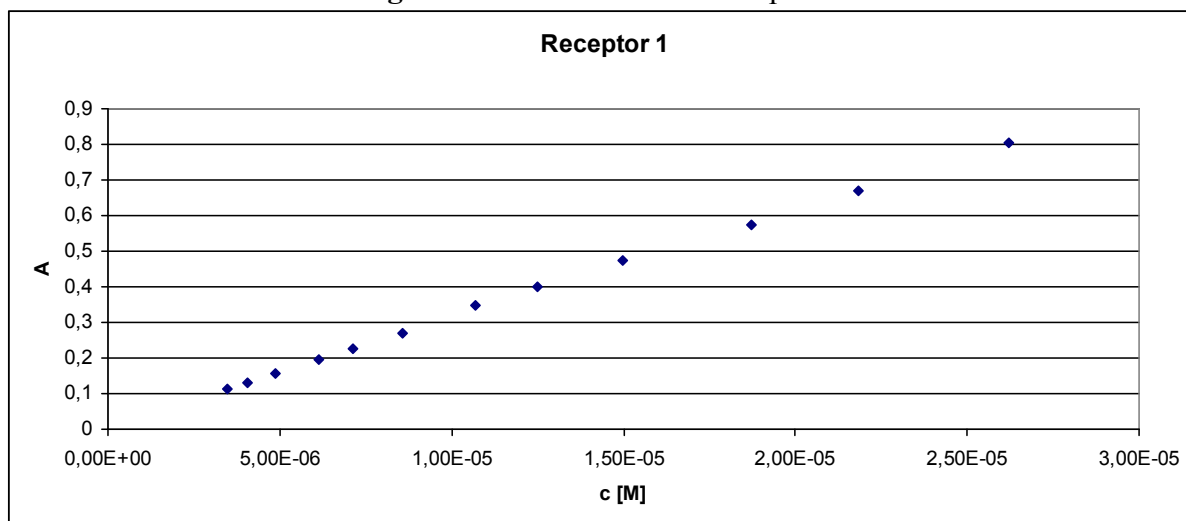

**Fig. S11:** Job plot (Host: Receptor 1, guest: Cl<sup>-</sup>)

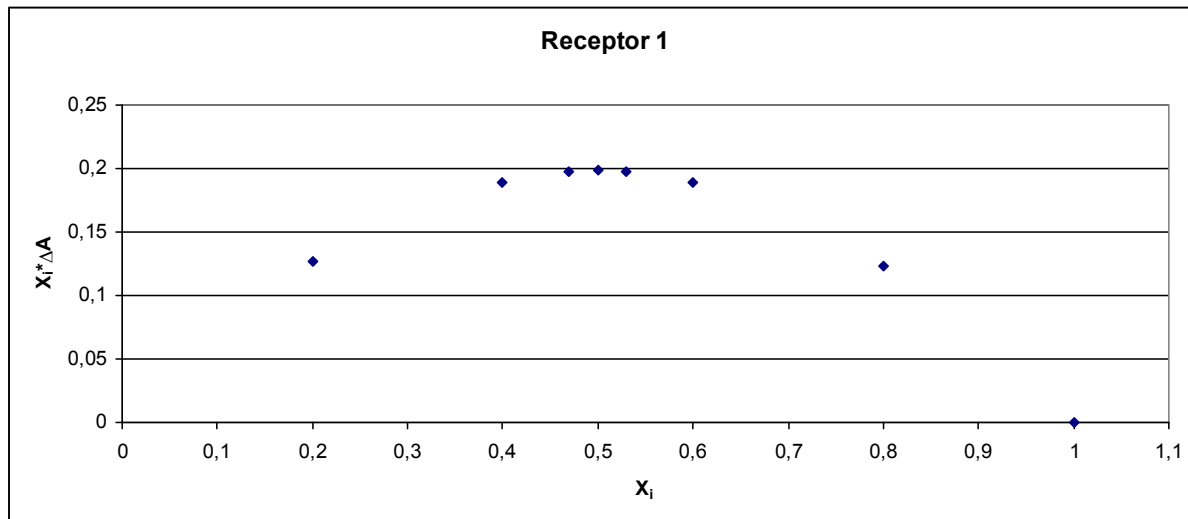

**Fig. S12:** Dilution curve of receptor 2.

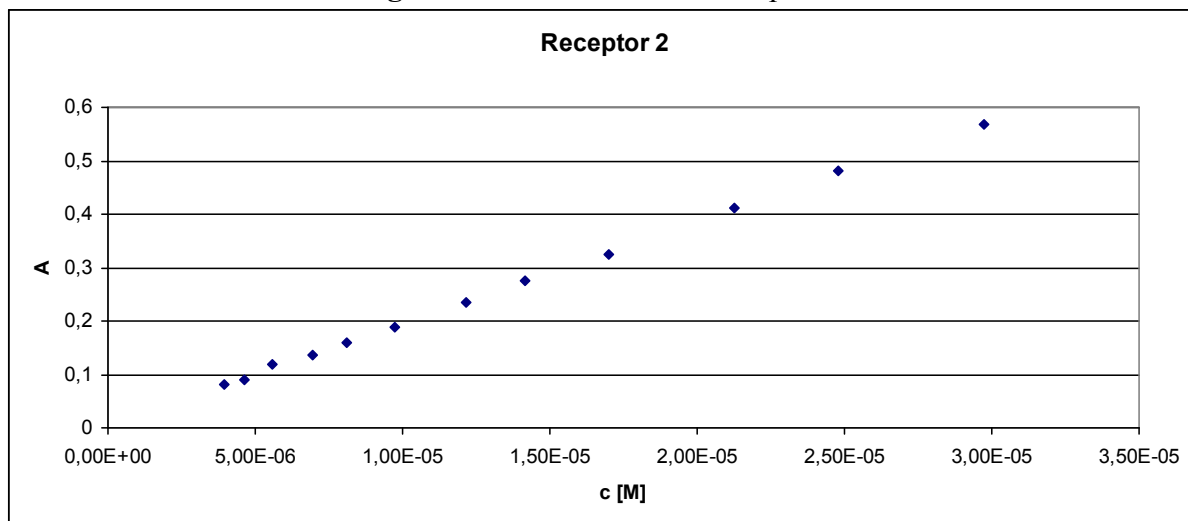

**Fig. S12:** Job plot (Host: Receptor 2, guest: Cl<sup>-</sup>)

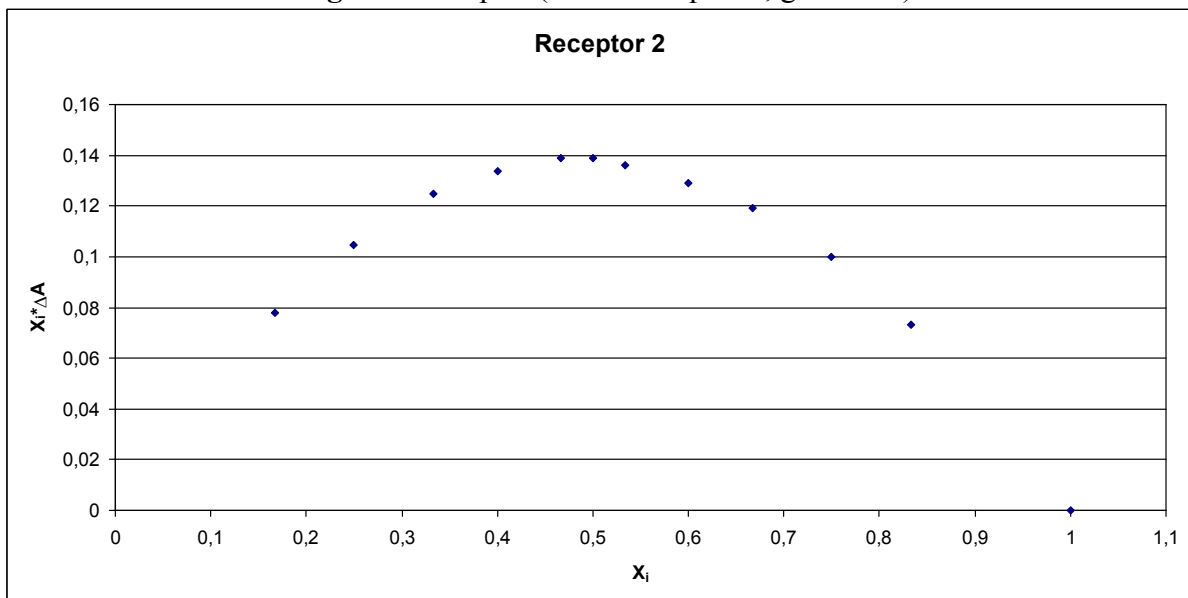

**Table S1:** Association Constants.

|                              | Receptor 1          |                 |                                   | Receptor 2           |                 |                                   |
|------------------------------|---------------------|-----------------|-----------------------------------|----------------------|-----------------|-----------------------------------|
|                              | TBA <sup>+</sup>    | Na <sup>+</sup> | K <sub>Na</sub> /K <sub>TBA</sub> | TBA <sup>+</sup>     | Na <sup>+</sup> | K <sub>Na</sub> /K <sub>TBA</sub> |
| NO <sub>2</sub> <sup>-</sup> | 3 800               | 7 800           | 2,05                              | 7 200                | 18 500          | 1,82                              |
| Br <sup>-</sup>              | 3 400               | 5 100           | 1,5                               | 3 700                | 4 700           | 1,27                              |
| Cl <sup>-*</sup>             | 18 200              | 33 500          | 1,84                              | 46 800               | 85 500          | 2,57                              |
| PhCOO <sup>-</sup>           | 460 000             | 161 000         | 0,35                              | 1,19·10 <sup>6</sup> | 526 000         | 0,44                              |
| Ac <sup>-</sup>              | 3,5·10 <sup>6</sup> | 280 000         | -                                 | deprotonation        | deprotonation   | -                                 |

\* Association constants for interactions of receptors **4** and **5** with chloride. Receptor **4**: K<sub>TBACl</sub>= 1700 M<sup>-1</sup>, K<sub>NaCl</sub>= 5100 M<sup>-1</sup>; Receptor **5**: K<sub>TBACl</sub>= 3900 M<sup>-1</sup>, K<sub>NaCl</sub>= 8900 M<sup>-1</sup>

**Fig. S13:** UV-Vis titration binding isotherms of receptor **1** with TBACl and TBACl in the presence of 1 equivalent of NaPF<sub>6</sub>. Experimental data (points), fitted curve (line).

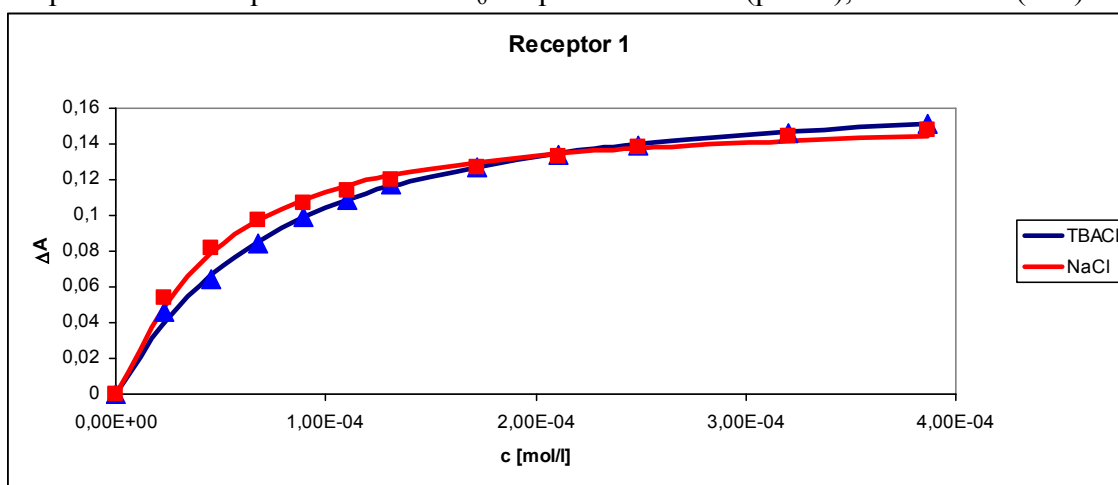

**Fig. S14:** UV-Vis titration binding isotherms of receptor **2** with TBACl and TBACl in the presence of 1 equivalent of NaPF<sub>6</sub>. Experimental data (points), fitted curve (line).

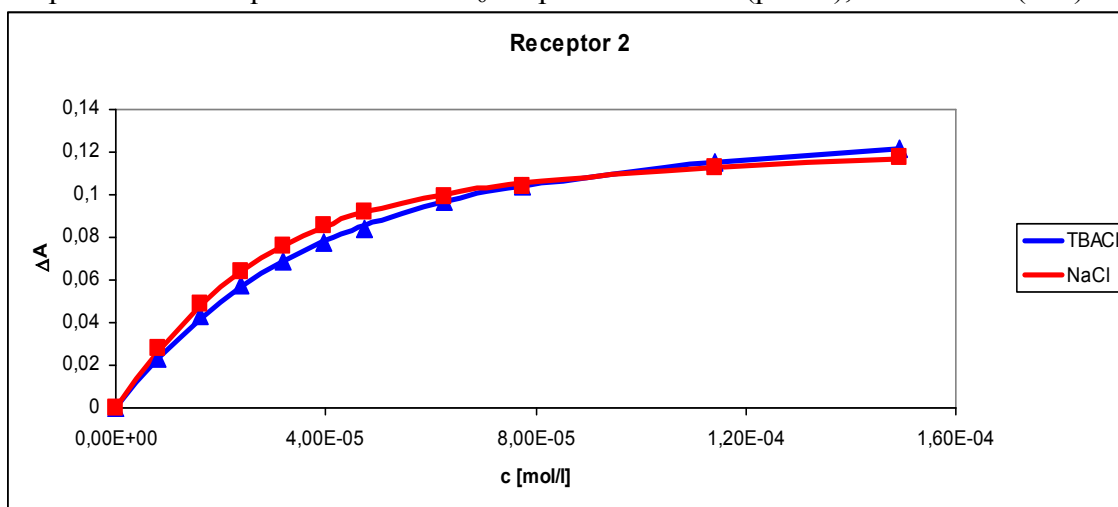



**Fig. S15:** UV-Vis titration binding isotherms of receptor **4** with TBACl and TBACl in the presence of 1 equivalent of NaPF<sub>6</sub>. Experimental data (points), fitted curve (line).

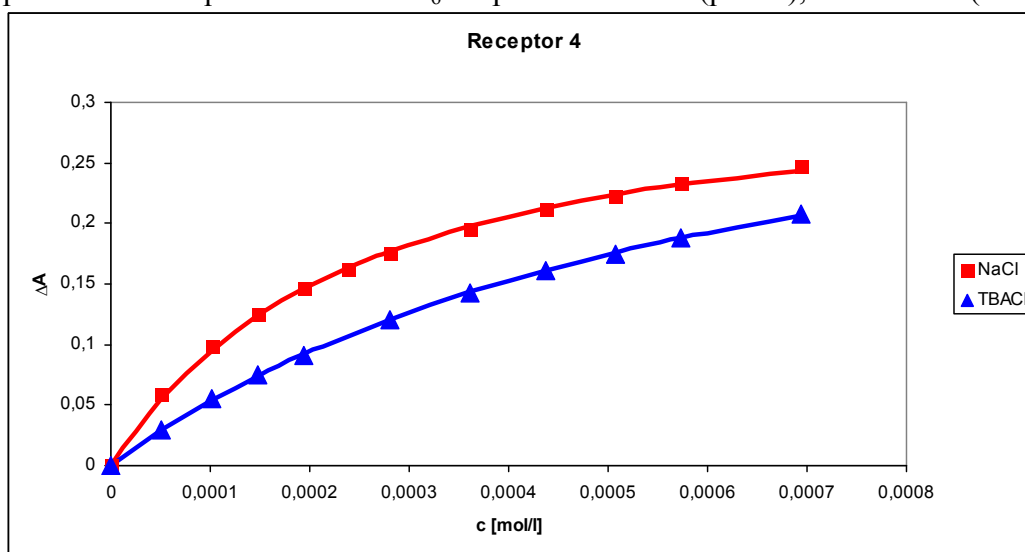

**Fig. S16:** UV-Vis titration binding isotherms of receptor **5** with TBACl and TBACl in the presence of 1 equivalent of NaPF<sub>6</sub>. Experimental data (points), fitted curve (line).

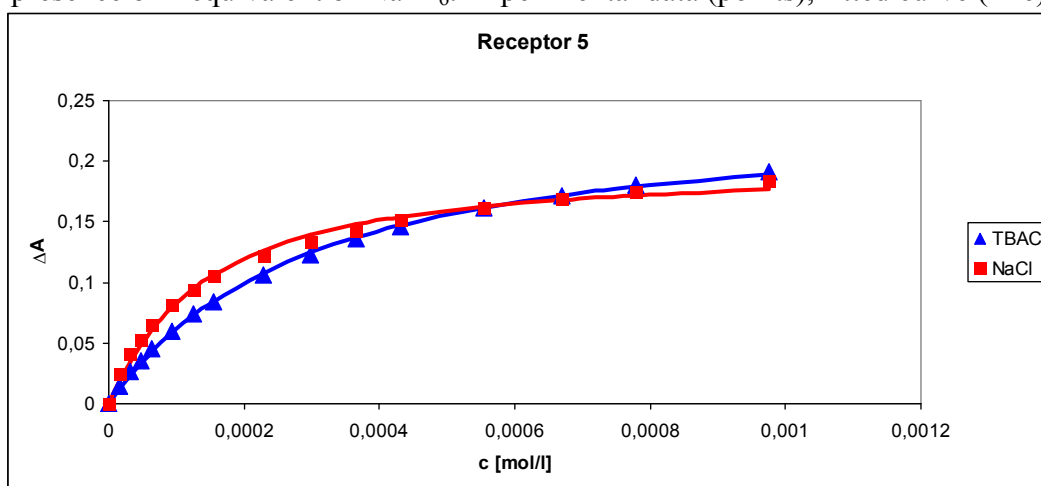

**Fig. S17:** UV-Vis titration binding isotherms of receptor **1** with TBANO<sub>2</sub> and TBANO<sub>2</sub> in the presence of 1 equivalent of NaPF<sub>6</sub>. Experimental data (points), fitted curve (line).

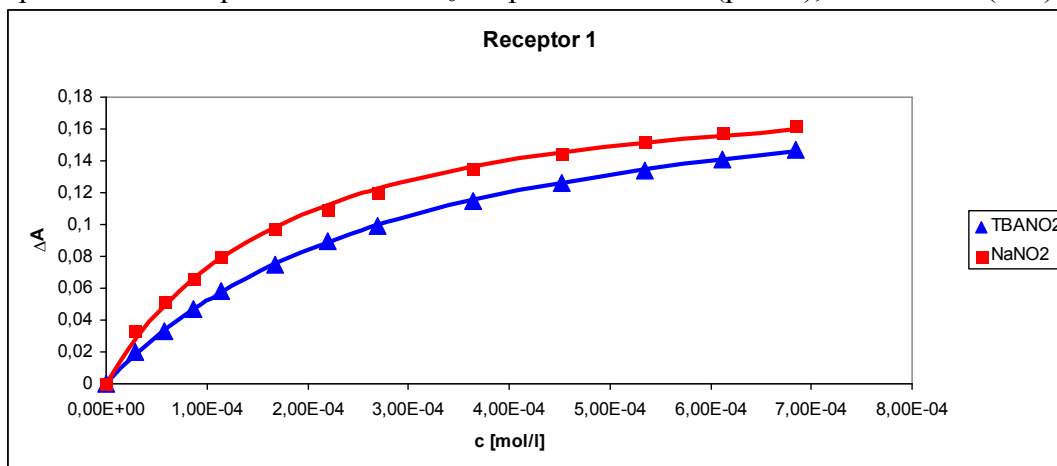

**Fig. S18:** UV-Vis titration binding isotherms of receptor **2** with TBANO<sub>2</sub> and TBANO<sub>2</sub> in the presence of 1 equivalent of NaPF<sub>6</sub>. Experimental data (points), fitted curve (line).

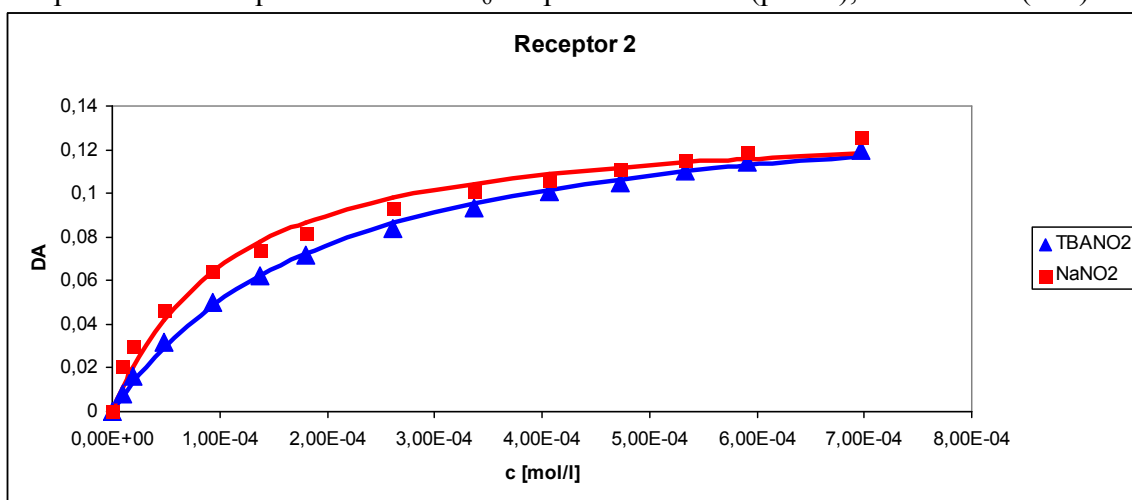

**Fig. S19:** UV-Vis titration binding isotherms of receptor **1** with TBABr and TBABr in the presence of 1 equivalent of NaPF<sub>6</sub>. Experimental data (points), fitted curve (line).

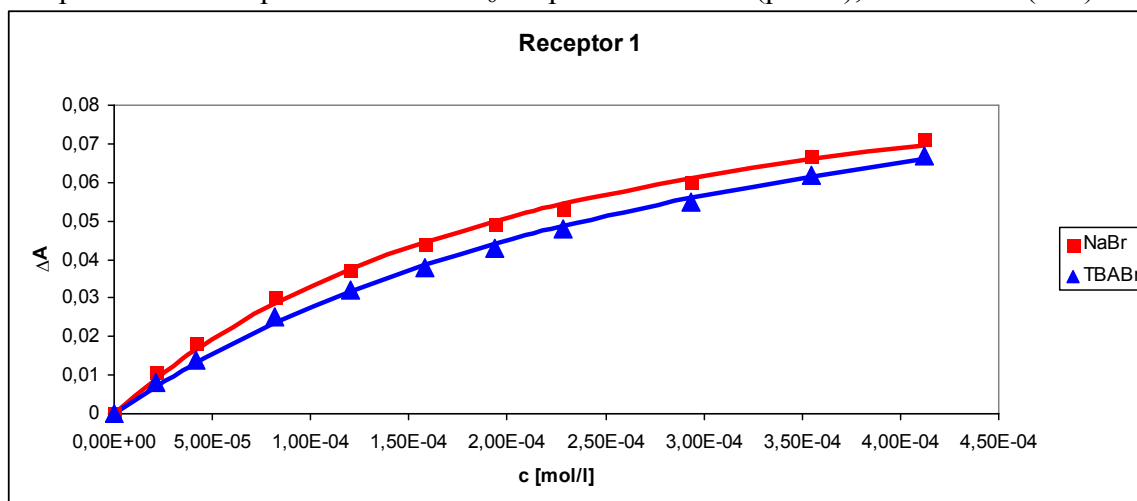

**Fig. S20:** UV-Vis titration binding isotherms of receptor **2** with TBABr and TBABr in the presence of 1 equivalent of NaPF<sub>6</sub>. Experimental data (points), fitted curve (line).

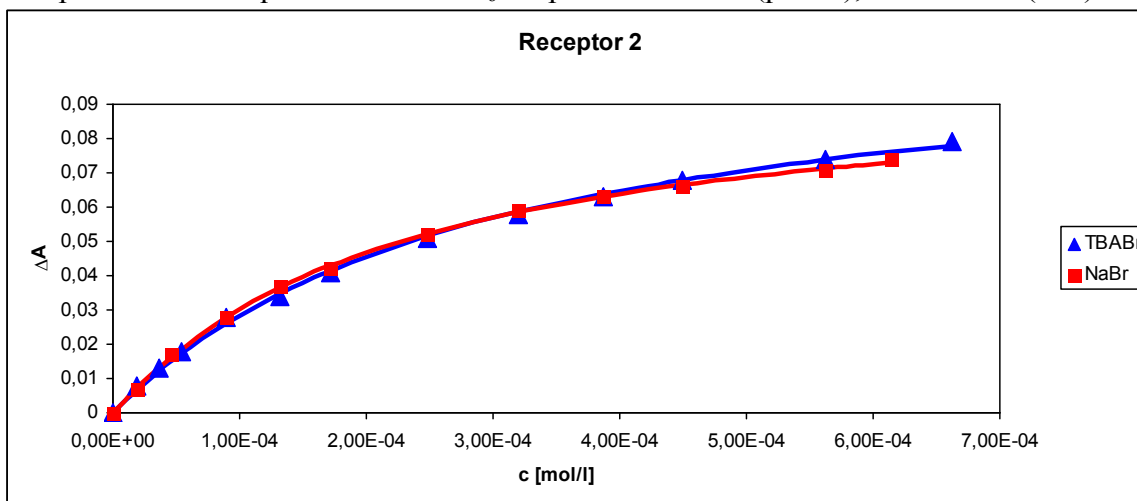

**Fig. S21:** UV-Vis titration binding isotherms of receptor 1 with PhCOOTBA and PhCOOTBA in the presence of 1 equivalent of NaPF<sub>6</sub>. Experimental data (points), fitted curve (line).

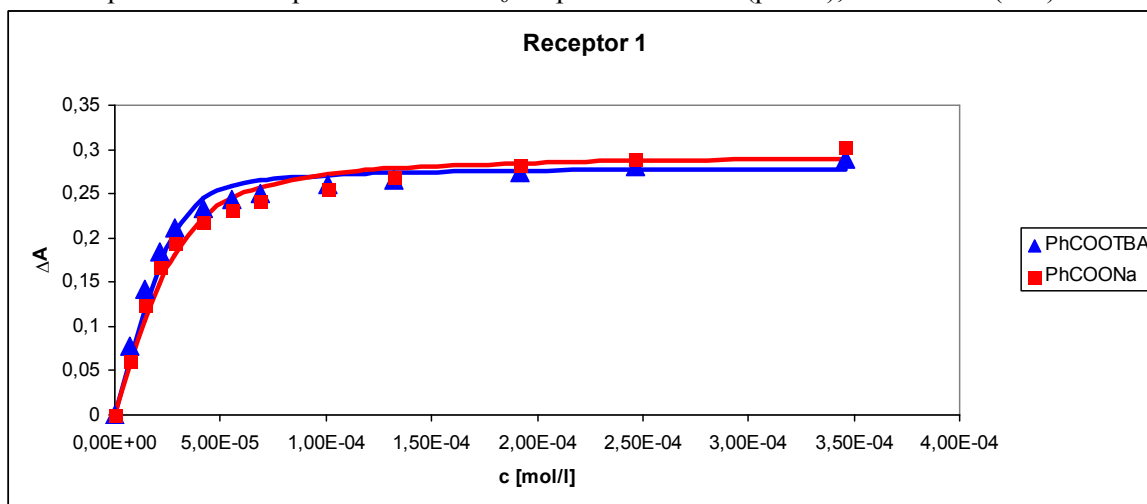

**Fig. S22:** UV-Vis titration binding isotherms of receptor 2 with PhCOOTBA and PhCOOTBA in the presence of 1 equivalent of NaPF<sub>6</sub>. Experimental data (points), fitted curve (line).

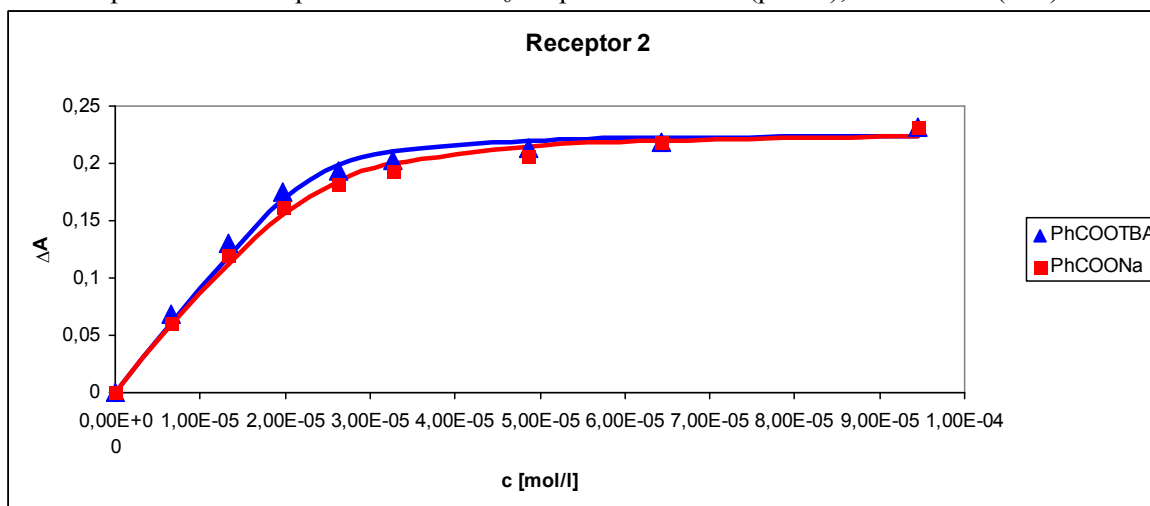

**Fig. S23:** UV-Vis titration binding isotherms of receptor 1 with AcTBA and AcTBA in the presence of 1 equivalent of NaPF<sub>6</sub>. Experimental data (points), fitted curve (line).

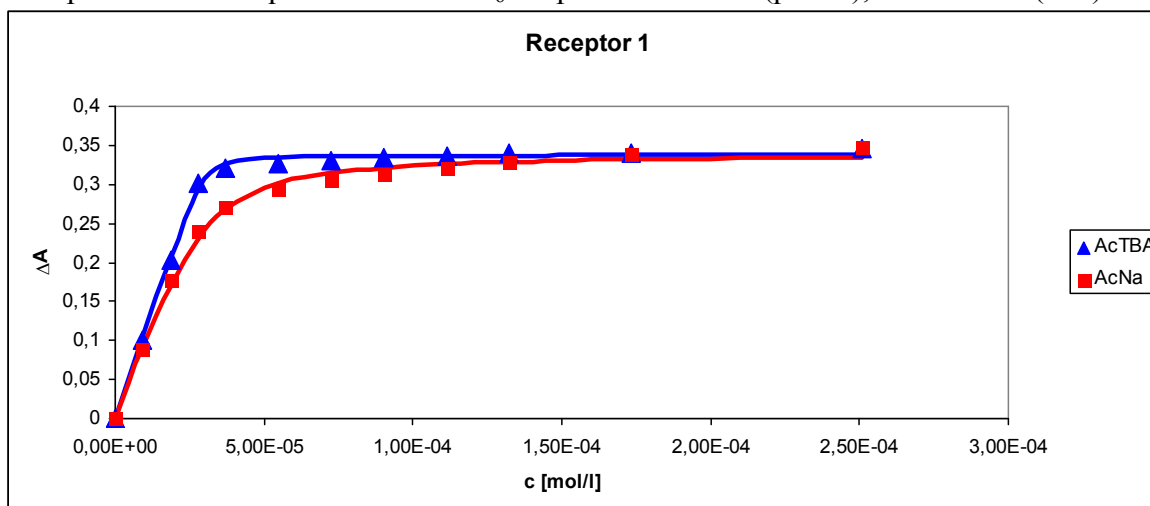

## NMR TITRATIONS

The  $^1\text{H}$  NMR titrations were performed on a Varian UnityPlus 200 MHz spectrometer, at 298K in  $\text{CD}_3\text{CN}$ . The anion TBA and cation  $\text{PF}_6$  salts were dried under high vacuum at 30–45 °C prior to use. In each case, a 500  $\mu\text{L}$  of freshly prepared 2.56 or 2.66 mM solution of receptor **1** or **2** was added to a 5mm NMR tube. Where applicable the solution also contained 1 molar equivalent of sodium hexafluorophosphate. Small aliquots of 60 mM solution of tetrabutylammonium bromide salts, containing **1** or **2** at 2.56 or 2.66 mM concentration, were added and a spectrum was acquired after each addition. Titration isotherms for NH protons were fitted to a 1:1 binding model using the HypNMR 2000 program.

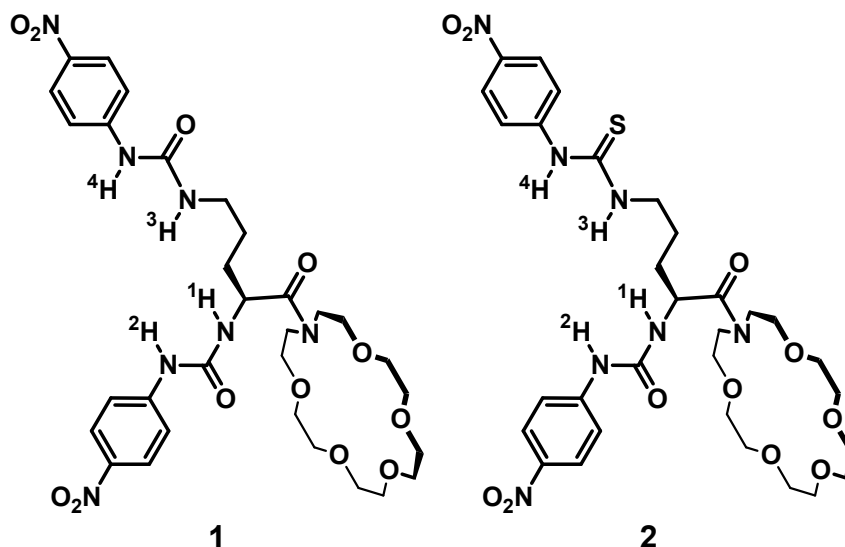

**Fig. S24:**  $^1\text{H}$  NMR titrations of receptors **1** and **2** with TBABr and TBABr in the presence of 1 equivalent of  $\text{NaPF}_6$ . Profiles based on the chemical shift ( $\delta$ , ppm) of urea  $\text{H}^1$  proton.

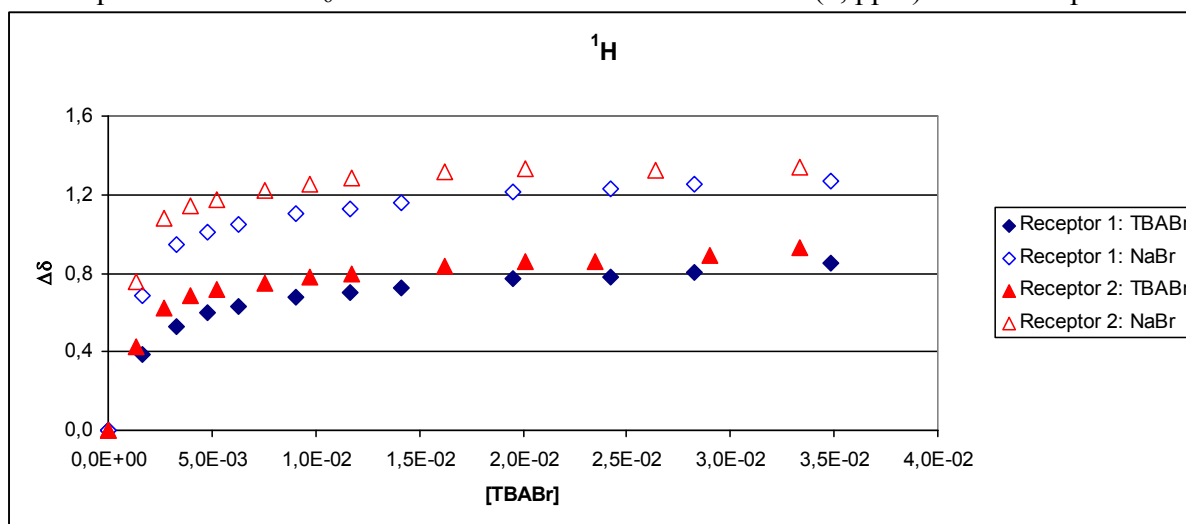

**Fig. S25:**  $^1\text{H}$  NMR titrations of receptors **1** and **2** with TBABr and TBABr in the presence of 1 equivalent of  $\text{NaPF}_6$ . Profiles based on the chemical shift ( $\delta$ , ppm) of urea  $\text{H}^2$  proton.

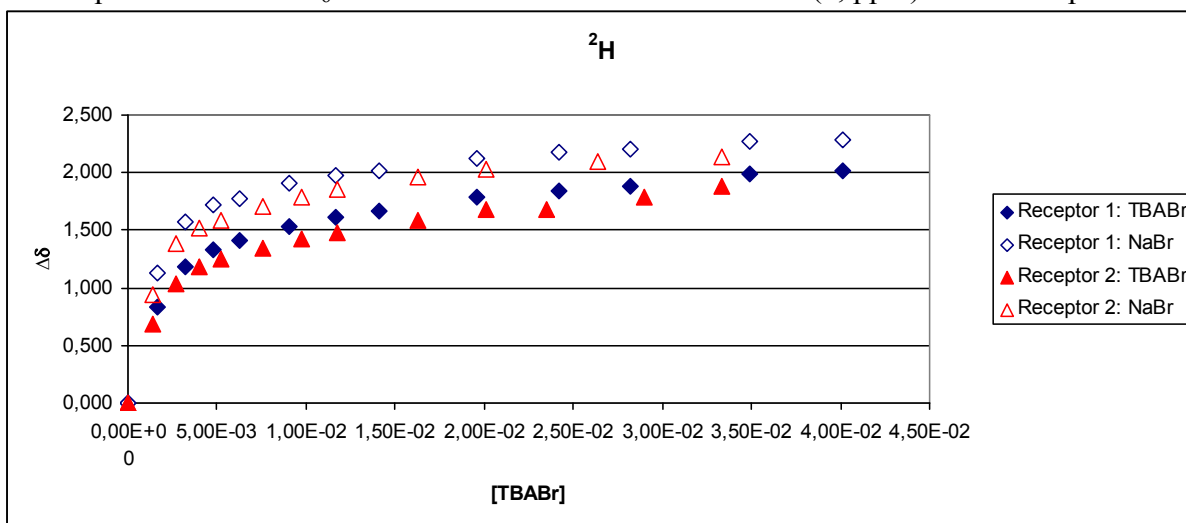

**Fig. S26:**  $^1\text{H}$  NMR titrations of receptors **1** and **2** with TBABr and TBABr in the presence of 1 equivalent of  $\text{NaPF}_6$ . Profiles based on the chemical shift ( $\delta$ , ppm) of (thio)urea  $\text{H}^3$  proton.

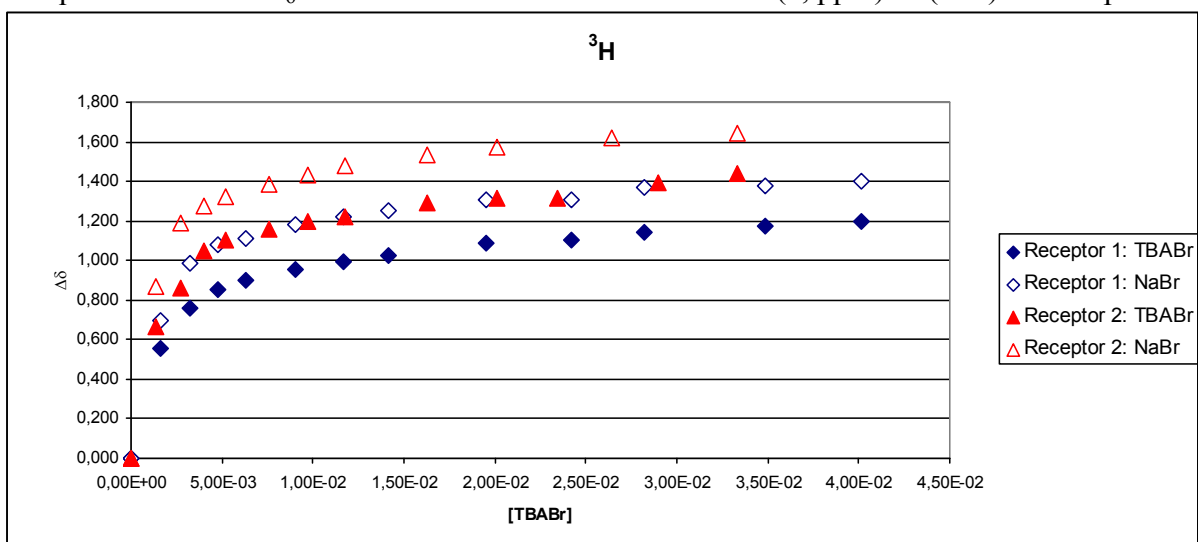

**Fig. S27:**  $^1\text{H}$  NMR titrations of receptors **1** and **2** with TBABr and TBABr in the presence of 1 equivalent of  $\text{NaPF}_6$ . Profiles based on the chemical shift ( $\delta$ , ppm) of (thio)urea  $\text{H}^4$  proton.

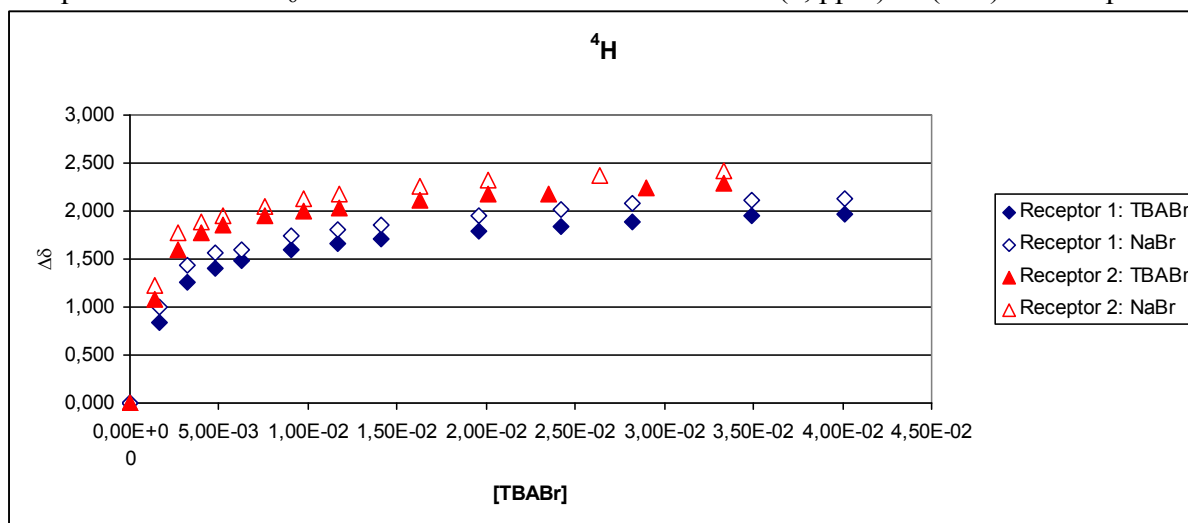

**Fig S 28:** Partial  $^1\text{H}$  NMR spectra (200 MHz, 298 K) of receptor **1** upon addition of 0, 0.6, 1.1, 1.6, 2.1, 3, 3.9, 4.7, 6.5, 8, 10.6, 13,3 of TBABr.

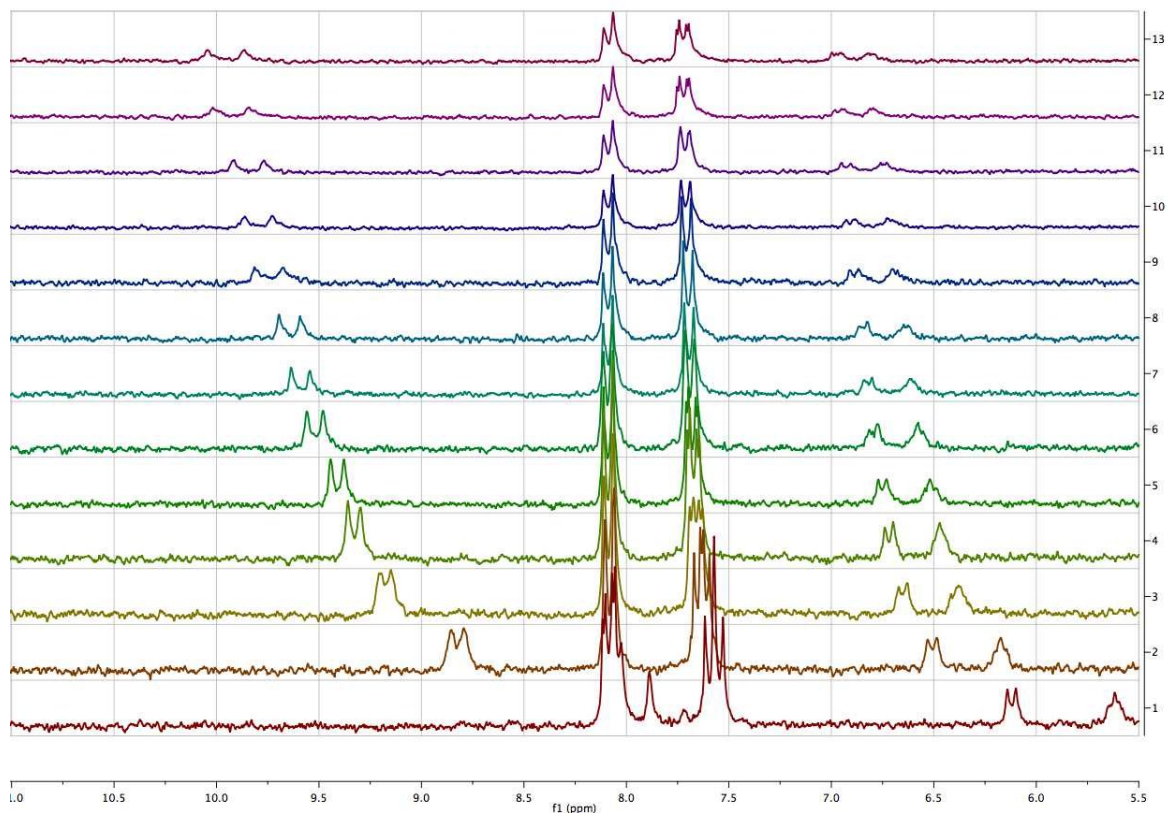

**Fig S29:** Partial  $^1\text{H}$  NMR spectra (200 MHz, 298 K) of receptor **1** in the presence of 1 eq. of  $\text{NaPF}_6$  upon addition of 0, 0.6, 1.1, 1.6, 2.1, 3, 3.9, 4.7, 6.5, 8, 10.6, 13.3 of TBABr.

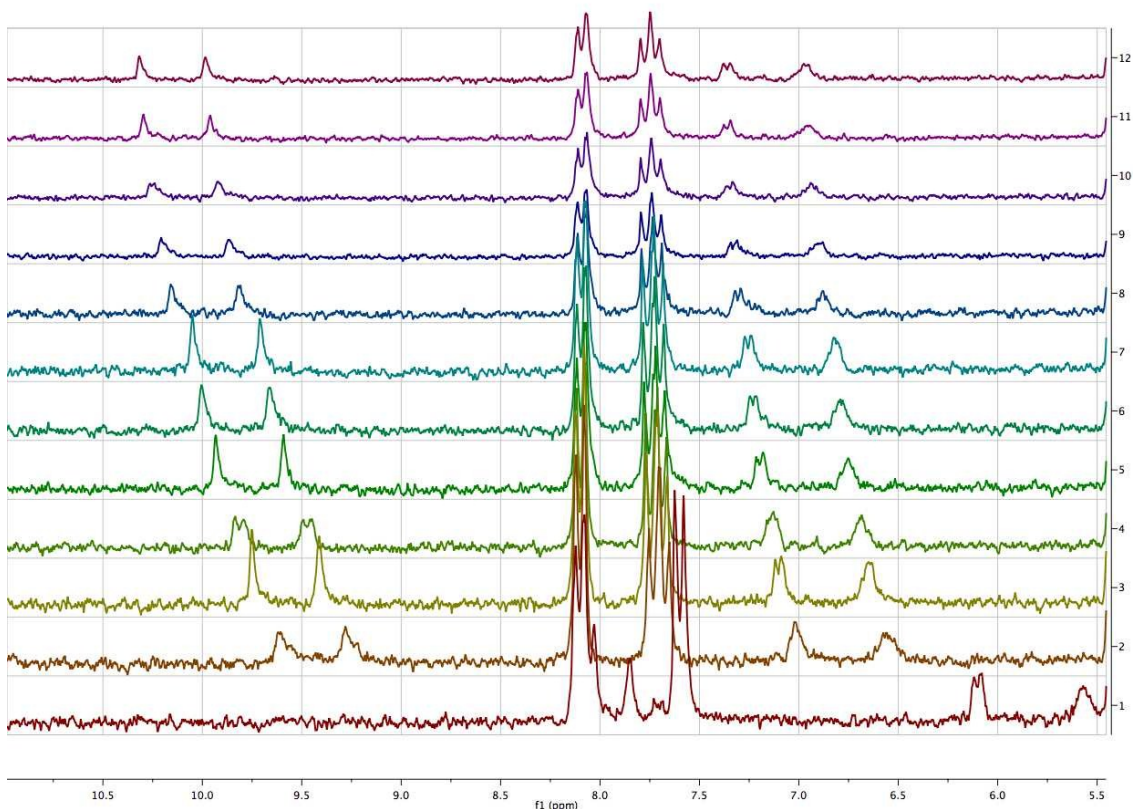

**Fig S30:** Partial  $^1\text{H}$  NMR spectra (200 MHz, 298 K) of receptor **2** upon addition of 0, 0.6, 1.1, 1.6, 2.1, 3, 3.9, 4.7, 6.5, 8, 10.6, 13.3 of TBABr.

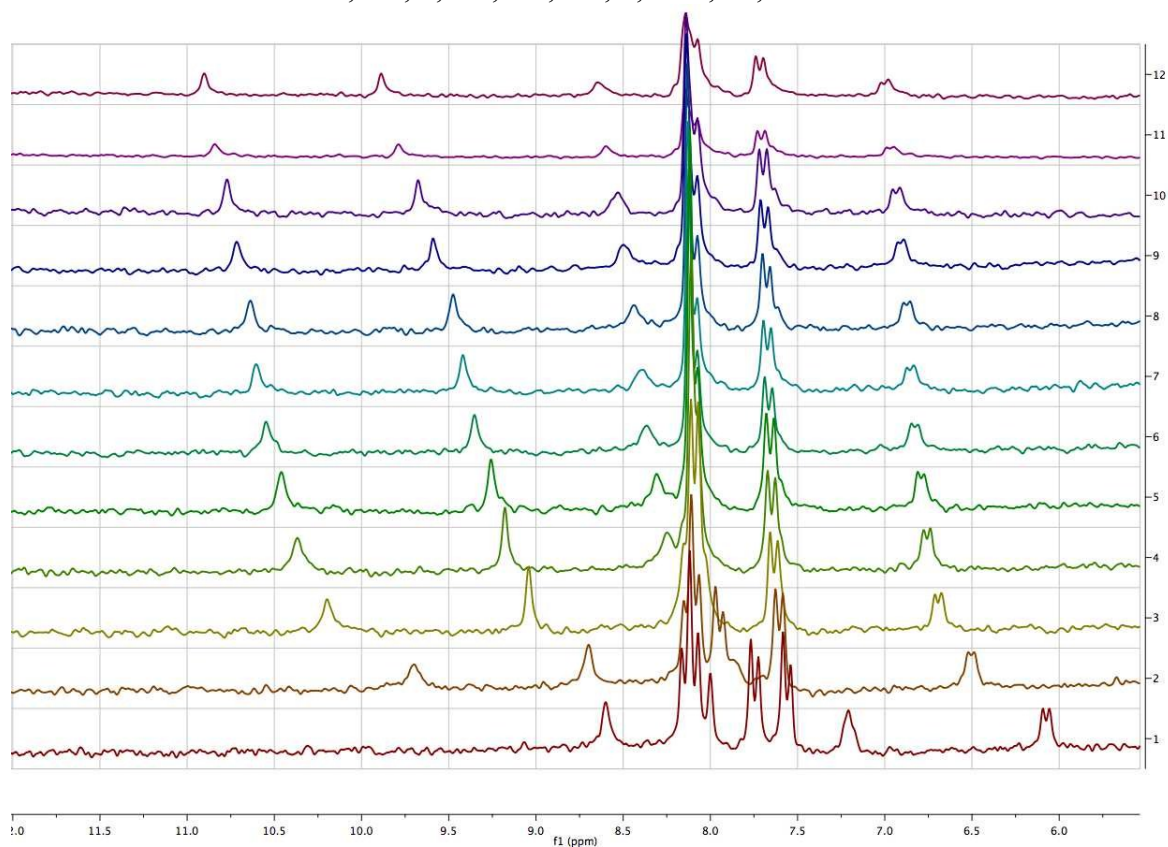



**Fig. S31:** Partial  $^1\text{H}$  NMR spectra (300 MHz, 298 K) of receptor **2** in the presence of 1 eq. of  $\text{NaPF}_6$  upon addition of 0, 0.6, 1.1, 1.6, 2.1, 3, 3.9, 4.7, 6.5, 8, 10.6, 13,3 of TBABr.

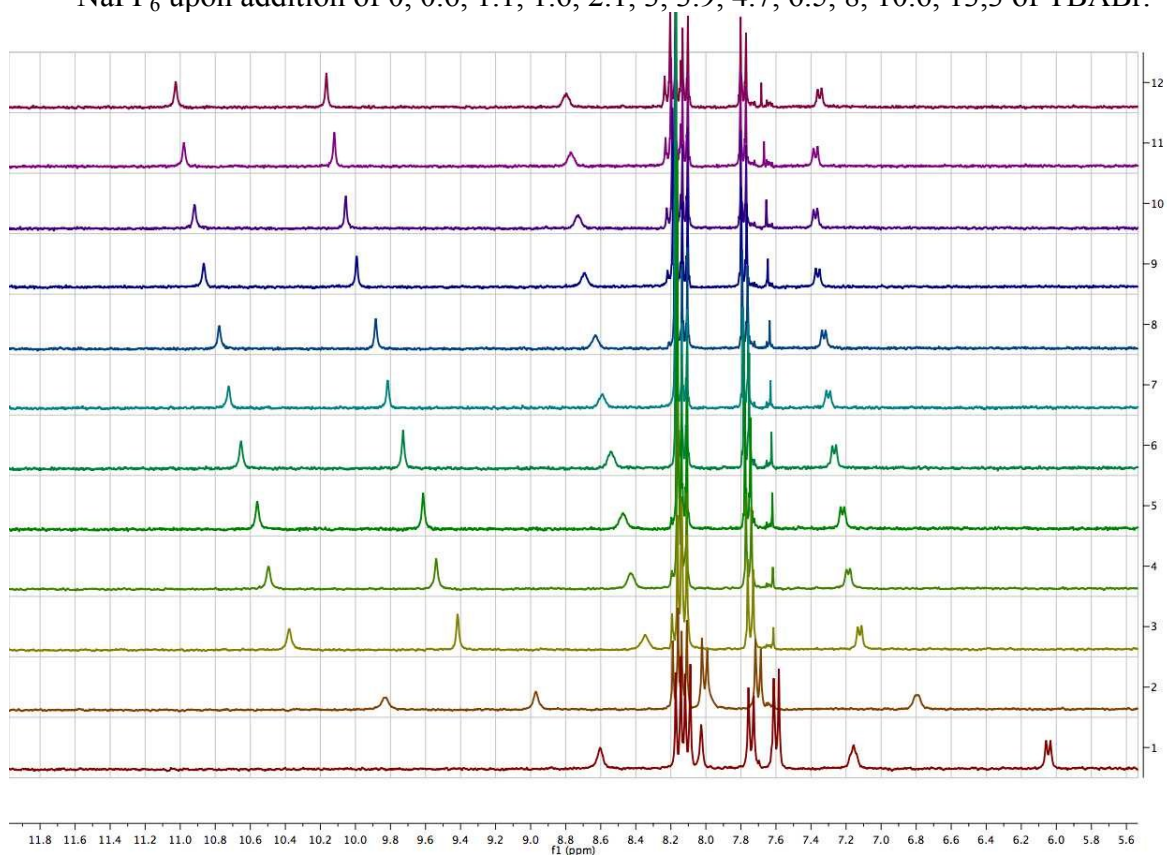

**Fig. S32:** NMR titration binding isotherms of receptor **1** with  $\text{Na}^+$  ( $K_a=15200\text{M}^{-1}$ )

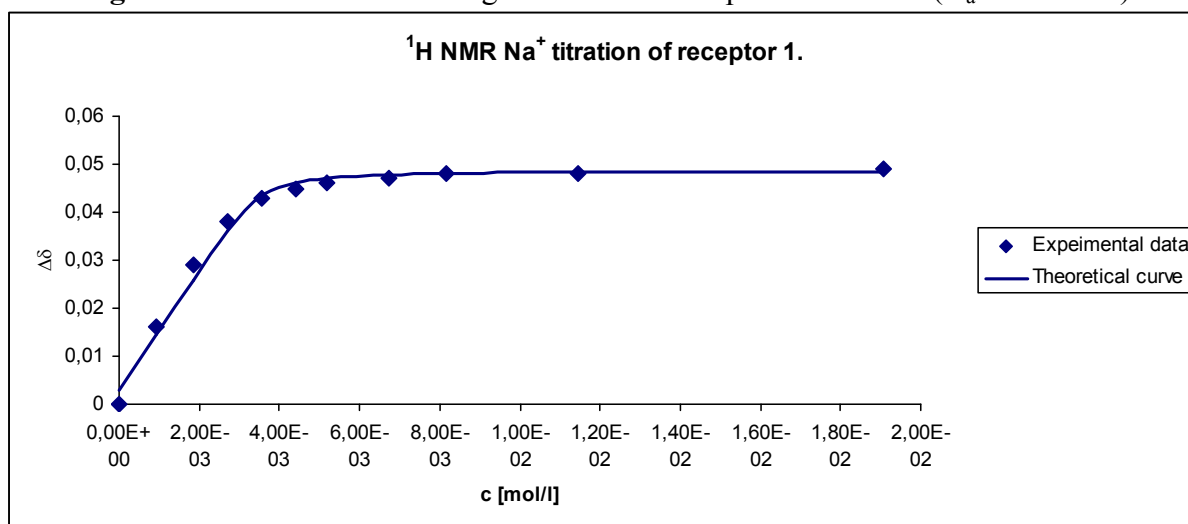

Supplement: c4nj01865f1.pdf [file c4nj01865f1.pdf]
